# Supplementary material for: Analysis of Fluctuation in the Heme-Binding Pocket and Heme Distortion in Hemoglobin and Myoglobin
Source: Life (Basel). 2022 Jan 29;12(2):210. doi: 10.3390/life12020210 (PMC8880375; doi:10.3390/life12020210)
Supplement: Supplementary file 1 [file life-12-00210-s001.zip › pdbids.xlsx]

## Sheet: pdbids
#Hb_a
1a00_A
1a00_C
1a01_A
1a01_C
1a0z_A
1a0z_C
1a3n_A
1a3n_C
1a3o_A
1a3o_C
1bbb_A
1bbb_C
1buw_A
1buw_C
1bz0_A
1bz0_C
1bz1_A
1bz1_C
1cls_A
1cls_C
1dxt_A
1dxt_C
1dxu_A
1dxu_C
1dxv_A
1dxv_C
1g9v_A
1g9v_C
1gbu_A
1gbu_C
1gbv_A
1gbv_C
1hbb_A
1hbb_C
1ird_A
1j3y_A
1j3y_C
1j3y_E
1j3y_G
1j3z_A
1j3z_C
1j3z_E
1j3z_G
1j40_A
1j40_C
1j40_E
1j40_G
1j41_A
1j41_C
1j41_E
1j41_G
1k0y_A
1k0y_C
1k1k_A
1kd2_A
1kd2_C
1nqp_A
1nqp_C
1qsh_A
1qsh_C
1qsi_A
1qsi_C
1qxe_A
1qxe_C
1r1y_A
1r1y_C
1rq3_A
1rq3_C
1sdk_A
1sdk_C
1sdl_A
1sdl_C
1shr_A
1shr_C
1thb_A
1thb_C
1uiw_A
1uiw_C
1uiw_E
1uiw_G
1vwt_A
1vwt_C
1xxt_A
1xxt_C
1xz2_A
1xz2_C
1y45_A
1y45_C
1y4f_A
1y4f_C
1y4g_A
1y4g_C
1y4p_A
1y4p_C
1y4v_A
1y4v_C
1y7d_A
1y7d_C
1y7z_A
1y7z_C
1y83_A
1y83_C
1ye2_A
1ye2_C
1yih_A
1yih_C
1yvq_A
1yvq_C
1yvt_A
2d5z_A
2d5z_C
2d60_A
2d60_C
2dn1_A
2dn2_A
2dn2_C
2dn3_A
2hbe_A
2hhb_A
2hhb_C
2w6v_A
2w6v_C
2w72_A
3d7o_A
3dut_A
3dut_C
3hhb_A
3hhb_C
3hxn_A
3hxn_C
3ic0_A
3ic0_C
3kmf_A
3kmf_C
3nl7_A
3nmm_A
3nmm_C
3oo4_A
3p5q_A
3qjb_A
3qjd_A
3qjd_C
3qje_A
3qje_C
3s65_A
3s65_C
3s66_A
3wcp_A
3wcp_C
3whm_A
3whm_C
4hhb_A
4hhb_C
4m4b_A
4mqg_A
4mqi_A
4mqj_A
4mqj_C
4mqj_E
4mqj_G
4n8t_A
4ni1_A
4rol_A
4rol_C
4rom_A
4rom_C
5e29_A
5e29_C
5e6e_A
5e83_A
5e83_C
5eui_A
5ksi_A
5ksi_C
5u3i_A
5u3i_C
5ucu_A
5urc_A
5urc_C
6bnr_A
6bnr_C
6bwp_A
6bwp_C
6bwu_A
6di4_A
6di4_C
6hbw_A
6hbw_C
6hk2_A
6hk2_C
6ka9_A
6ka9_C
6ka9_E
6ka9_G
6kae_A
6kae_C
6kae_E
6kae_G
6kah_A
6kah_C
6kah_E
6kah_G
6kai_A
6kai_C
6kai_E
6kai_G
6kao_A
6kap_A
6kaq_A
6kar_A
6kas_A
6kas_C
6kat_A
6kat_C
6kau_A
6kau_C
6kav_A
6kav_C
6l5v_A
6l5w_A
6l5x_A
6l5x_C
6l5y_A
6l5y_C
6nq5_A
6xdt_A
6xdt_C
6xe7_A
6xe7_C
7jy0_A
7jy0_C
7jy1_A
7jy1_C
7jy3_A
7jy3_C
#Hb_b
1a00_B
1a00_D
1a01_B
1a01_D
1a0z_B
1a0z_D
1a3n_B
1a3n_D
1a3o_B
1a3o_D
1abw_B
1abw_C
1bab_B
1bab_D
1bbb_B
1bbb_D
1buw_B
1buw_D
1bz0_B
1bz0_D
1bz1_B
1bz1_D
1bzz_B
1bzz_D
1c7b_B
1c7b_D
1c7c_B
1c7c_C
1c7d_B
1c7d_C
1cbl_A
1cbl_B
1cbl_C
1cbl_D
1cbm_A
1cbm_B
1cbm_C
1cbm_D
1cls_B
1cls_D
1dxt_B
1dxt_D
1dxu_B
1dxu_D
1dxv_B
1dxv_D
1g9v_B
1g9v_D
1gbu_B
1gbu_D
1gbv_B
1gbv_D
1hbb_B
1hbb_D
1ird_B
1j3y_B
1j3y_D
1j3y_F
1j3y_H
1j3z_B
1j3z_D
1j3z_F
1j3z_H
1j40_B
1j40_D
1j40_F
1j40_H
1j41_B
1j41_D
1j41_F
1j41_H
1j7w_B
1j7w_D
1j7y_B
1j7y_D
1k0y_B
1k0y_D
1k1k_B
1kd2_B
1kd2_D
1nqp_B
1nqp_D
1o1j_B
1o1j_C
1o1k_B
1o1k_D
1o1l_B
1o1l_C
1o1m_B
1o1m_C
1o1n_B
1o1n_C
1o1o_B
1o1o_D
1o1p_B
1o1p_C
1qi8_B
1qi8_D
1qsh_B
1qsh_D
1qsi_B
1qsi_D
1qxe_B
1qxe_D
1r1y_B
1r1y_D
1rq3_B
1rq3_D
1sdk_B
1sdk_D
1sdl_B
1sdl_D
1shr_B
1shr_D
1thb_B
1thb_D
1uiw_B
1uiw_D
1uiw_F
1uiw_H
1vwt_B
1vwt_D
1xxt_B
1xxt_D
1xy0_B
1xy0_D
1xz2_B
1xz2_D
1xz4_B
1xz4_D
1xz7_B
1xz7_D
1y45_B
1y45_D
1y4f_B
1y4f_D
1y4g_B
1y4g_D
1y4p_B
1y4p_D
1y4v_B
1y4v_D
1y7d_B
1y7d_D
1y7z_B
1y7z_D
1y83_B
1y83_D
1ye2_B
1ye2_D
1yih_B
1yih_D
1yvq_B
1yvq_D
1yvt_B
2d5z_B
2d5z_D
2d60_B
2d60_D
2dn1_B
2dn2_B
2dn2_D
2dn3_B
2hbe_B
2hhb_B
2hhb_D
2rao_B
2rao_D
2w6v_B
2w6v_D
2w72_B
2w72_D
3d7o_B
3dut_B
3dut_D
3hhb_B
3hhb_D
3hxn_B
3hxn_D
3ic0_B
3ic0_D
3kmf_B
3kmf_D
3nl7_B
3nmm_B
3nmm_D
3oo4_B
3p5q_B
3qjb_B
3qjd_B
3qjd_D
3qje_B
3qje_D
3s65_B
3s65_D
3s66_B
3w4u_B
3w4u_D
3w4u_F
3wcp_B
3wcp_D
3whm_B
3whm_D
4hhb_B
4hhb_D
4m4b_B
4mqg_B
4mqi_B
4n8t_B
4ni1_B
4rol_B
4rol_D
4rom_B
4rom_D
5e29_B
5e29_D
5e6e_B
5e83_B
5e83_D
5ksi_B
5ksi_D
5sw7_B
5u3i_B
5u3i_D
5ucu_B
5urc_B
5urc_D
5wog_C
5wog_D
5woh_B
5woh_D
6bnr_B
6bnr_D
6bwp_B
6bwp_D
6bwu_B
6di4_B
6di4_D
6hbw_B
6hbw_D
6hk2_B
6hk2_D
6ka9_B
6ka9_D
6ka9_F
6ka9_H
6kae_B
6kae_D
6kae_F
6kae_H
6kah_B
6kah_D
6kah_F
6kah_H
6kai_B
6kai_D
6kai_F
6kai_H
6kao_B
6kap_B
6kaq_B
6kar_B
6kas_B
6kas_D
6kat_B
6kat_D
6kau_B
6kau_D
6kav_B
6kav_D
6l5v_B
6l5w_B
6l5x_B
6l5x_D
6l5y_B
6l5y_D
6nq5_B
6xdt_B
6xdt_D
6xe7_B
6xe7_D
7jy0_B
7jy0_D
7jy1_B
7jy1_D
7jy3_B
7jy3_D
#Mb
102m_A
104m_A
106m_A
109m_A
110m_A
111m_A
1a6g_A
1a6k_A
1a6m_A
1a6n_A
1abs_A
1ajg_A
1ajh_A
1bz6_A
1bzp_A
1bzr_A
1ch1_A
1ch2_A
1ch3_A
1ch7_A
1ch9_A
1cik_A
1cio_A
1co8_A
1co9_A
1cp0_A
1cq2_A
1do1_A
1do3_A
1do4_A
1do7_A
1dti_A
1duo_A
1dxc_A
1dxd_A
1ebc_A
1f63_A
1f65_A
1fcs_A
1h1x_A
1hjt_A
1j52_A
1jdo_A
1jp9_A
1jpb_A
1jw8_A
1l2k_A
1ltw_A
1lue_A
1mbc_A
1mbd_A
1mbi_A
1mbn_A
1mbo_A
1mcy_A
1mgn_A
1mlf_A
1mlg_A
1mlh_A
1mlj_A
1mlk_A
1mll_A
1mlm_A
1mln_A
1mlo_A
1mlq_A
1mlr_A
1mls_A
1mlu_A
1moa_A
1moc_A
1mod_A
1mti_A
1mtj_A
1mtk_A
1mym_A
1myz_A
1mz0_A
1n9f_A
1n9h_A
1n9i_A
1n9x_A
1naz_A
1o16_A
1obm_A
1ofj_A
1ofk_A
1spe_A
1swm_A
1tes_A
1u7r_A
1u7s_A
1vxa_A
1vxb_A
1vxc_A
1vxd_A
1vxe_A
1vxf_A
1vxg_A
1vxh_A
1wvp_A
2blh_A
2bli_A
2blj_A
2bw9_A
2bwh_A
2e2y_A
2evk_A
2evp_A
2g0r_A
2g0s_A
2g0v_A
2g0x_A
2g0z_A
2g10_A
2g11_A
2g12_A
2g14_A
2jho_A
2mb5_A
2mbw_A
2mgb_A
2mgc_A
2mgd_A
2mge_A
2mgf_A
2mgg_A
2mgh_A
2mgi_A
2mgj_A
2mgk_A
2mgl_A
2mgm_A
2mya_A
2myb_A
2myc_A
2myd_A
2mye_A
2oh8_A
2oh9_A
2oha_A
2ohb_A
2spl_A
2spm_A
2spn_A
2spo_A
2w6w_A
2w6x_A
2w6y_A
2z6s_A
2z6t_A
2zsn_A
2zso_A
2zsp_A
2zsq_A
2zsr_A
2zss_A
2zst_A
2zsx_A
2zsy_A
2zsz_A
2zt0_A
2zt1_A
2zt2_A
2zt3_A
2zt4_A
3a2g_A
3e4n_A
3e55_A
3e5i_A
3e5o_A
3ecl_A
3ecx_A
3ecz_A
3ed9_A
3eda_A
3edb_A
3h57_A
3h58_A
3k9z_A
3m38_A
3m39_A
3m3a_A
3m3b_A
3mn0_A
3nml_A
3o89_A
3ogb_A
3sdn_A
3u3e_A
4fwx_A
4fwy_A
4fwz_A
4h07_A
4h0b_A
4it8_A
4lpi_A
4mbn_A
4nxa_A
4nxc_A
4of9_A
4ood_A
4pnj_A
4pq6_A
4pqb_A
4pqc_A
4qau_A
4tyx_A
5b84_A
5b85_A
5c6y_A
5hav_A
5hlq_A
5hlu_A
5hlx_A
5jom_A
5kd1_A
5kkk_A
5m3s_A
5mbn_A
5o41_A
5oj9_A
5oja_A
5ojb_A
5ojc_A
5ut7_A
5ut8_A
5ut9_A
5uta_A
5utb_A
5utc_A
5utd_A
5vnu_A
5vrt_A
5vzn_A
5vzo_A
5vzp_A
5vzq_A
5wjk_A
5xkv_A
5xkw_A
5yce_A
5ych_A
5yci_A
5yci_B
5ycj_A
5ycj_B
5yzf_A
5zeo_A
5zzf_A
5zzg_A
6bmg_A
6bmg_B
6cf0_A
6d45_A
6e02_A
6e03_A
6e04_A
6f17_A
6f18_A
6f19_A
6g5a_A
6g5b_A
6g5t_A
6jp1_A
6jp1_B
6krc_A
6krf_A
6m8f_A
6mv0_A
6n02_A
6z4r_A
6z4t_A
7a44_A
7a45_A
7cez_A
7kyr_A
7l3u_A
7l3y_A
